# Supplementary material for: FI-ICP-TOFMS for quantification of biologically essential trace elements in cerebrospinal fluid – high-throughput at low sample volume
Source: Royal Society of Chemistry journal article supplement (doi:10.1039/c9an00039a), 2019-01-01
Supplement: c9an00039a1.pdf [file c9an00039a1.pdf]

## Supporting Information

### FI-ICP-TOFMS for quantification of biologically essential trace elements in cerebrospinal fluid - high-throughput at low sample volume

Sarah Theiner, Anna Schoeberl, Lisa Fischer, Sophie Neumayer, Stephan Hann, Gunda Koellensperger

#### ICP-MS/MS measurements

Measurements were performed with an Agilent 8800 ICP-MS/MS unit (Agilent Technologies, Tokyo, Japan). The ICP-MS instrument was equipped with a MicroMist nebulizer (200  $\mu\text{L min}^{-1}$  nominal sample uptake, AHF Analysentechnik AG, Tuebingen, Germany) and a quartz cyclonic spray chamber (Elemental Scientific Inc., Omaha, USA) that was Peltier-cooled to 2 °C. The instrument was tuned on a daily basis in order to achieve maximum sensitivity, low oxide formation ( $^{140}\text{Ce}^{16}\text{O}^+ / ^{140}\text{Ce}^+ < 1.5\%$ ) and a doubly charged ratio of  $^{140}\text{Ce}^{2+} / ^{140}\text{Ce}^+ < 2\%$ . Elements were monitored in standard mode and using oxygen as reaction gas with a flow rate of 0.32  $\text{mL min}^{-1}$  and mass selection steps on both quadrupoles. The following isotopes with a respective integration time of 0.05 s were monitored in standard mode:  $^{25}\text{Mg}$ ,  $^{43}\text{Ca}$ ,  $^{27}\text{Al}$ ,  $^{56}\text{Fe}$ ,  $^{65}\text{Cu}$ ,  $^{66}\text{Zn}$ ,  $^{111}\text{Cd}$  and  $^{206}\text{Pb}$ . The following isotopes with a respective integration time of 0.05 s were monitored in oxygen gas mode using mass shift modality:  $^{25}\text{Mg} \rightarrow ^{41}\text{Mg}$ ,  $^{27}\text{Al} \rightarrow ^{43}\text{Al}$ ,  $^{43}\text{Ca} \rightarrow ^{59}\text{Ca}$ ,  $^{56}\text{Fe} \rightarrow ^{72}\text{Fe}$ ,  $^{65}\text{Cu} \rightarrow ^{81}\text{Cu}$ ,  $^{66}\text{Zn} \rightarrow ^{82}\text{Zn}$ ,  $^{111}\text{Cd} \rightarrow ^{127}\text{Cd}$  and  $^{206}\text{Pb} \rightarrow ^{222}\text{Pb}$ .

A bio-inert Agilent 1260 HPLC system (Agilent Technologies, Waldbronn, Germany) was used for flow injection measurements. The HPLC was directly connected to the nebulizer of the ICP-MS/MS instrument by a PEEK capillary tubing with an inner diameter of 0.127 mm and a length of approx. 0.8 m. The following chromatographic conditions were used: injection volume: 5  $\mu\text{L}$ ; flow rate: 0.30  $\text{mL min}^{-1}$ ; isocratic elution;  $\text{CH}_3\text{COONH}_4$  (50 mM, pH=6.8) was employed as mobile phase. The data were recorded and evaluated with the Agilent MassHunter Chromatography software package, MassHunter 4.1 Version C.01.01, 2014. Instrumental parameters of ICP-MS/MS measurements are summarized in Table S1.

**Table S1.** Instrumental parameters for ICP-MS measurements.

|                                           | ICP-SFMS | ICP-MS/MS | ICP-TOFMS                                                                                    |
|-------------------------------------------|----------|-----------|----------------------------------------------------------------------------------------------|
| Plasma power [W]                          | 1250     | 1550      | 1550                                                                                         |
| Cone materials                            | Pt       | Ni        | Ni                                                                                           |
| Plasma gas flow [L min <sup>-1</sup> ]    | 16.0     | 15.0      | 14.0                                                                                         |
| Auxiliary gas flow [L min <sup>-1</sup> ] | 0.80     | 0.80      | 0.80                                                                                         |
| Nebulizer gas flow [L min <sup>-1</sup> ] | 1.18     | 1.10      | 1.18                                                                                         |
| Masses notched                            | -        | -         | <sup>16</sup> O <sup>+</sup> , <sup>37</sup> Cl <sup>+</sup> , <sup>40</sup> Ar <sup>+</sup> |

**Table S2.** Multi-element quantification in serum Seronorm reference material by an open vessel acid digestion procedure with a sample intake of 50  $\mu\text{L}$  using external calibration and isotope dilution analysis followed by ICP-SFMS detection, measured in low resolution mode ( $m/\Delta m$  300) and medium resolution mode ( $m/\Delta m >4500$ ), for  $n=5$  independently prepared samples, respectively.

| isotope                      | external calibration                        |                                           |            |                 | isotope dilution analysis                 |            |                 |
|------------------------------|---------------------------------------------|-------------------------------------------|------------|-----------------|-------------------------------------------|------------|-----------------|
|                              | certified value<br>[ $\mu\text{g L}^{-1}$ ] | concentration<br>[ $\mu\text{g L}^{-1}$ ] | RSD<br>[%] | recovery<br>[%] | concentration<br>[ $\mu\text{g L}^{-1}$ ] | RSD<br>[%] | recovery<br>[%] |
| $^{25}\text{Mg}(\text{MR})$  | $1.68 \times 10^4 \pm 0.34 \times 10^4$     | $1.72 \times 10^4 \pm 0.069 \times 10^4$  | 4          | 102             | -                                         | -          | -               |
| $^{27}\text{Al}(\text{MR})$  | $50 \pm 25$                                 | $66 \pm 2.3$                              | 3          | 124             | -                                         | -          | -               |
| $^{43}\text{Ca}(\text{MR})$  | $8.6 \times 10^4 \pm 1.75 \times 10^4$      | $9.53 \times 10^4 \pm 0.41 \times 10^4$   | 4          | 110             | -                                         | -          | -               |
| $^{56}\text{Fe}(\text{MR})$  | $1.47 \times 10^3 \pm 0.3 \times 10^3$      | $1.4 \times 10^3 \pm 0.05 \times 10^3$    | 4          | 95              | $1.46 \times 10^3 \pm 0.018 \times 10^3$  | 1.3        | 99              |
| $^{65}\text{Cu}(\text{MR})$  | $1.07 \times 10^3 \pm 0.22 \times 10^3$     | $1.08 \times 10^3 \pm 0.023 \times 10^3$  | 2          | 102             | $1.13 \times 10^3 \pm 0.016 \times 10^3$  | 1.4        | 106             |
| $^{66}\text{Zn}(\text{MR})$  | $1.06 \times 10^3 \pm 0.21 \times 10^3$     | $1.91 \times 10^3 \pm 0.004 \times 10^3$  | 2          | 181             | $1.86 \times 10^3 \pm 0.031 \times 10^3$  | 1.7        | 176             |
| $^{111}\text{Cd}(\text{LR})$ | 0.13*                                       | $0.18 \pm 0.008$                          | 4          | 128             | -                                         | -          | -               |
| $^{206}\text{Pb}(\text{LR})$ | 0.40*                                       | $0.52 \pm 0.04$                           | 7          | 123             | -                                         | -          | -               |

\*approximate values given in the serum Seronorm reference material certificate, no control range available

**Table S3.** Multi-element quantification in CSF quality control using external calibration and flow injection experiments with ICP-MS/MS detection, using either standard mode or oxygen gas mode in mass shift modality, for  $n=5$  independently prepared samples, respectively.

| isotope           | standard mode                             |            | isotope                                       | oxygen gas mode                           |            |
|-------------------|-------------------------------------------|------------|-----------------------------------------------|-------------------------------------------|------------|
|                   | concentration<br>[ $\mu\text{g L}^{-1}$ ] | RSD<br>[%] |                                               | concentration<br>[ $\mu\text{g L}^{-1}$ ] | RSD<br>[%] |
| $^{25}\text{Mg}$  | $3.96 \times 10^4 \pm 0.008 \times 10^4$  | 1.9        | $^{25}\text{Mg} \rightarrow ^{41}\text{Mg}$   | $4.11 \times 10^4 \pm 0.18 \times 10^4$   | 0.4        |
| $^{27}\text{Al}$  | $24.2 \pm 1.6$                            | 6.8        | $^{27}\text{Al} \rightarrow ^{43}\text{Al}$   | $27.2 \pm 5.1$                            | 19         |
| $^{43}\text{Ca}$  | $7.28 \times 10^3 \pm 0.14 \times 10^3$   | 19         | $^{44}\text{Ca} \rightarrow ^{60}\text{Ca}$   | $2.82 \times 10^3 \pm 0.13 \times 10^3$   | 3.6        |
| $^{56}\text{Fe}$  | $164 \pm 18$                              | 11         | $^{56}\text{Fe} \rightarrow ^{72}\text{Fe}$   | $162 \pm 1$                               | 0.6        |
| $^{65}\text{Cu}$  | $30.2 \pm 0.82$                           | 2.7        | $^{65}\text{Cu} \rightarrow ^{81}\text{Cu}$   | <LOQ                                      | -          |
| $^{66}\text{Zn}$  | $2.17 \times 10^3 \pm 0.079 \times 10^3$  | 3.6        | $^{66}\text{Zn} \rightarrow ^{82}\text{Zn}$   | $2.12 \times 10^3 \pm 0.088 \times 10^3$  | 4.2        |
| $^{111}\text{Cd}$ | < LOQ                                     | -          | $^{111}\text{Cd} \rightarrow ^{127}\text{Cd}$ | < LOQ                                     | -          |
| $^{206}\text{Pb}$ | $0.44 \pm 0.02$                           | 5.5        | $^{206}\text{Pb} \rightarrow ^{222}\text{Pb}$ | < LOQ                                     | -          |

**Table S4.** Multi-element quantification in serum Seronorm reference material by flow injection with a sample intake of 5  $\mu\text{L}$  using online isotope dilution analysis and ICP-TOFMS detection, for  $n=5$  independently prepared samples.

| serum Seronorm reference material |                                          |                                          |            |                 |
|-----------------------------------|------------------------------------------|------------------------------------------|------------|-----------------|
| isotope                           | target value<br>[ $\mu\text{g L}^{-1}$ ] | concentration [ $\mu\text{g L}^{-1}$ ]   | RSD<br>[%] | recovery<br>[%] |
| Fe                                | $1.47 \times 10^3 \pm 0.3 \times 10^3$   | $1.51 \times 10^3 \pm 0.057 \times 10^3$ | 3.8        | 102             |
| Cu                                | $1.07 \times 10^3 \pm 0.22 \times 10^3$  | $1.07 \times 10^3 \pm 0.029 \times 10^3$ | 2.7        | 100             |
| Zn                                | $1.06 \times 10^3 \pm 0.21 \times 10^3$  | $9.97 \times 10^2 \pm 0.22 \times 10^2$  | 2.2        | 94              |

**Table S5.** The precision of Fe, Cu and Zn isotope ratios is determined from blank measurements ( $n=6$ ) using online isotope dilution analysis and ICP-TOFMS detection.

| isotope ratio                   | average | stdev | RSD [%] |
|---------------------------------|---------|-------|---------|
| $^{56}\text{Fe}/^{57}\text{Fe}$ | 70.9    | 1.1   | 1.6     |
| $^{63}\text{Cu}/^{65}\text{Cu}$ | 2.02    | 0.01  | 0.47    |
| $^{66}\text{Zn}/^{67}\text{Zn}$ | 6.33    | 0.08  | 1.3     |
| $^{64}\text{Zn}/^{67}\text{Zn}$ | 10.7    | 0.15  | 1.4     |
| $^{68}\text{Zn}/^{67}\text{Zn}$ | 4.67    | 0.06  | 1.4     |
| $^{70}\text{Zn}/^{67}\text{Zn}$ | 0.17    | 0.002 | 1.4     |

### Equations used for online isotope dilution analysis

$$M_x(t) = M_y(t) \times \frac{R_y - M_b R_b(t)}{M_b R_b(t) - R_x} \times \frac{h_{iy}}{h_{ix}} \quad M_y(t) = M_x(t) \times \frac{R_x - M_b R_b(t)}{M_b R_b(t) - R_y} \times \frac{h_{ix}}{h_{iy}} \quad \text{Equation (1)}$$

|          |                                              |
|----------|----------------------------------------------|
| $M_x(t)$ | mass flow of the sample                      |
| $M_y(t)$ | mass flow of the spike                       |
| $R_x$    | ratio of the isotopes A/B in the sample      |
| $R_y$    | ratio of the isotopes A/B in the spike       |
| $R_b(t)$ | ratio of the isotopes A/B in the blend       |
| $h_{ix}$ | abundance of the spike isotope in the sample |
| $h_{iy}$ | abundance of the spike isotope in the spike  |
